# Supplementary material
Source: PubMed Central journal article supplement (PMC5298396)
Supplement: DS_10.1177_0022034516680349.pdf [file DS_10.1177_0022034516680349.pdf]

# Loss of Notch3 Signaling Enhances Osteogenesis of Mesenchymal Stem Cells from Mandibular Torus

X. Dou, W. Park, S. Lee, Q.Z. Zhang, L.R. Carrasco, and A.D. Le

## Appendix

**Appendix Table. The list of primers used in Quantitative RT-PCR.**

| Primer         | Directions | Sequences                    |
|----------------|------------|------------------------------|
| Notch3         | Forward    | 5'-ATGCAGGATAGCAAGGAGGA-3'   |
|                | Reverse    | 5'-AAGTGGTCCAACAGCAGCTT-3'   |
| Jag1           | Forward    | 5'-ATCGTGCTGCCTTTTCAGTTT-3'  |
|                | Reverse    | 5'-ACTGTCAGGTTGAACGGTGTC-3'  |
| Osterix        | Forward    | 5'-AGCCTCAGGATGGCGTC-3'      |
|                | Reverse    | 5'-AGAGTTGTTGAGTCCCGCAG-3'   |
| Dlx5           | Forward    | 5'-CGCTAGCTCCTACCACCAGT-3'   |
|                | Reverse    | 5'-TTTGCCATTACCATTCTCA-3'    |
| Hey1           | Forward    | 5'-TGGATCACCTGAAAATGCTG-3'   |
|                | Reverse    | 5'-CGAAATC CCAAACCTCCGATA-3' |
| Hey2           | Forward    | 5'-TTTGAAGATGCTTCAGGCAA-3'   |
|                | Reverse    | 5'-GGCACTCTCGGAATCCTATG-3'   |
| ATF4           | Forward    | 5'-GTCCCTCCAACAACAGCAAG-3'   |
|                | Reverse    | 5'-CTATACCCAACAGGGCATCC-3'   |
| NFATc1         | Forward    | 5'-CCCTGTCCCCTACGTCCTAC-3'   |
|                | Reverse    | 5'-CACCTCAATCCGAAGCTCAT-3'   |
| Runx2          | Forward    | 5'-CAGTAGATGGACCTCGGGAA-3'   |
|                | Reverse    | 5'- CCTAAATCACTGAGGCGGTC-3'  |
| BSP            | Forward    | 5'-AAAGTGAGAACGGGGAACCT-3'   |
|                | Reverse    | 5'-GATGCAAAGCCAGAATGGAT-3'   |
| $\beta$ -actin | Forward    | 5'-GAGACCTTCAACACCCCAGCC-3'  |
|                | Reverse    | 5'-AATGTACGCACGATTTCCC-3'    |
